# Supplementary material
Source: PubMed Central journal article supplement (PMC6156780)
Supplement: NIHMS982870-supplement-All_supplemental_material.pdf [file NIHMS982870-supplement-All_supplemental_material.pdf]

## Supplementary Material

# Estimating Alzheimer’s Disease Progression Rates from Normal Cognition Through Mild Cognitive Impairment and Stages of Dementia

Matthew Davis, Thomas O’Connell, Scott Johnson, Stephanie Cline\*, Elizabeth Merikle, Ferenc Martenyi and Kit N. Simpson

*Medicus Economics Milton, Massachusetts, United States, Takeda Pharmaceuticals USA Inc Ringgold standard institution - Global Outcomes Research, Takeda Parkway, Deerfield, Illinois 60015-5713, United States; Medical University of South Carolina Ringgold standard institution, Charleston, South Carolina, United States*

A.

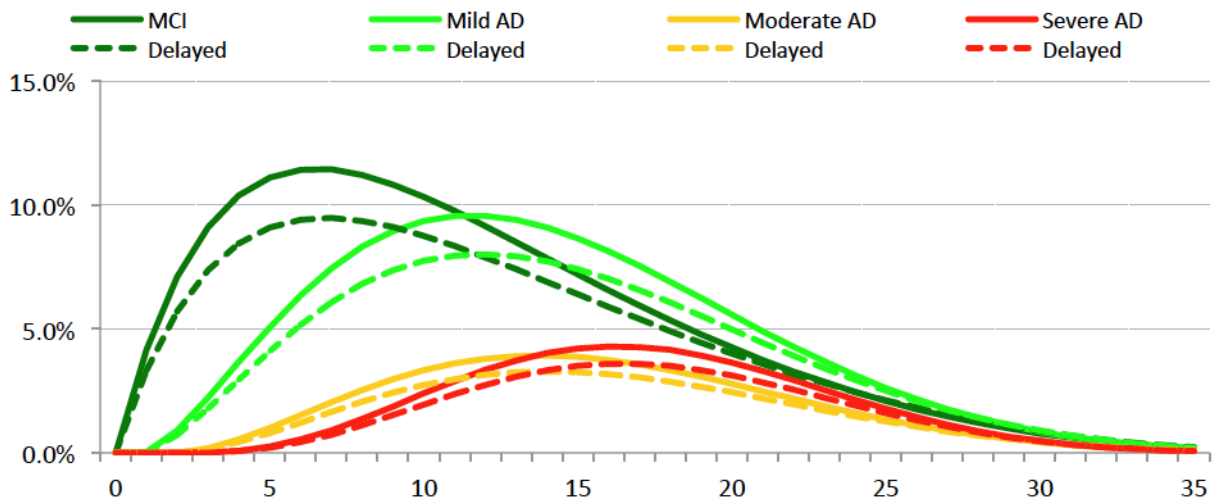

AD, Alzheimer’s disease; MCI, mild cognitive impairment

B.

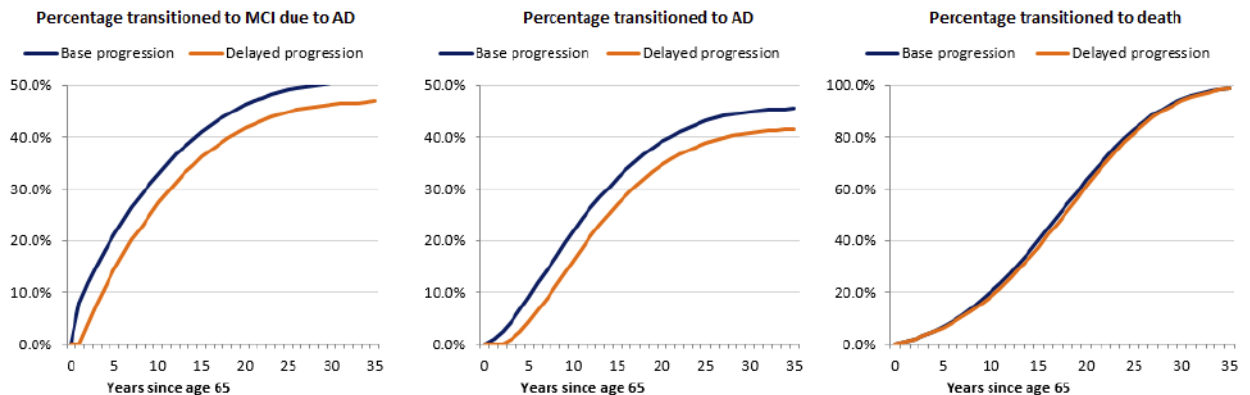

AD, Alzheimer’s disease; MCI, mild cognitive impairment

C.

|                                                         |      |
|---------------------------------------------------------|------|
| For a cohort of size:                                   | 100  |
| For a 2-year delay in risk of MCI due to AD:            |      |
| Cases of MCI due to AD avoided:                         | 4.01 |
| Cases of AD dementia avoided:                           | 4.00 |
| Average delay in onset of AD (years):                   | 1.47 |
| Average increase in patient survival (years):           | 0.42 |
| Average increase in time with normal cognition (years): | 0.83 |
| Average reduction of time in long-term care (years):    | 0.03 |

AD, Alzheimer’s disease; MCI, mild cognitive impairment

**Fig. (S1).** Modeling the effects of a 2-year delay in risk of transitioning from normal cognition to MCI due to AD in a cohort of 100 normal cognition patients at age 65 years. A: Progression with and without a 2-year delay in the risk of transitioning from normal cognition to MCI due to AD; B: Transitions with and without a 2-year delay in the risk of transitioning from normal cognition to MCI due to AD; C: Epidemiology results for a 2-year delay in the risk of transitioning from normal cognition to MCI due to AD.
